# Supplementary material
Source: MDPI journal article supplement (https://www.mdpi.com/1424-8247/16/8/1120)
Supplement: s1 [file s1]

# Design and Synthesis of New Anthranyl Phenylhydrazides: Antileishmanial Activity and Structure–Activity Relationship

Claudia do Carmo Maquiaveli <sup>1,\*</sup>, Edson Roberto da Silva <sup>1,\*</sup>, Barbara Hild de Jesus <sup>1</sup>, Caio Eduardo Oliveira Monteiro <sup>1</sup>, Tiago Rodrigues Navarro <sup>2</sup>, Luiz Octavio Pereira Branco <sup>2</sup>, Isabela Souza dos Santos <sup>2</sup>, Nanashara Figueiredo Reis <sup>2</sup>, Arieli Bernardo Portugal <sup>3,4</sup>, João Luiz Mendes Wanderley <sup>3</sup>, André Borges Farias <sup>5,6</sup>, Nelilma Correia Romeiro <sup>6</sup> and Evanoel Crizanto de Lima <sup>2,\*</sup>

<sup>1</sup> Laboratório de Farmacologia e Bioquímica (LFBq), Departamento de Medicina Veterinária, Universidade de São Paulo Faculdade de Zootecnia e Engenharia de Alimentos, Av. Duque de Caxias Norte 225, Pirassununga 13635-900, SP, Brazil

<sup>2</sup> Laboratório de Catálise e Síntese de Substâncias Bioativas, Instituto Multidisciplinar de Química, CM UFRJ-Macaé, Universidade Federal do Rio de Janeiro, Macaé CEP 27971-525, RJ, Brazil

<sup>3</sup> Laboratório de Imunoparasitologia, Instituto de Ciências Médicas, Centro Multidisciplinar UFRJ, Macaé CEP 27979-000, RJ, Brazil

<sup>4</sup> Programa de Pós Graduação em Biociências e Biotecnologia, Universidade Estadual do Norte Fluminense, Campos dos Goytacazes CEP 28013-602, RJ, Brazil

<sup>5</sup> Unidad Académica de Yucatán, Instituto de Investigaciones en Matemáticas Aplicadas y en Sistemas, Universidad Nacional Autónoma de México, Mérida 97302, Yucatán, Mexico

<sup>6</sup> Integrated Laboratory of Scientific Computing (LICC), Federal University of Rio de Janeiro (UFRJ)—Campus Macaé, Aluizio Silva Gomes Avenue 50, Granjas Cavaleiros, Macaé 27930-560, RJ, Brazil

\* Correspondence: cmaquiaveli40@gmail.com (C.d.C.M.); edsilva@usp.br (E.R.d.S.); evanoel.crizanto@gmail.com (E.C.d.L.)

Supporting Information

Table S1. Targets predicted by chemogenomics.

| Uniprot | Target name           | Organism               |
|---------|-----------------------|------------------------|
| Q01782  | Pteridine reductase 1 | Leishmania major       |
| Q27686  | Pyruvate kinase       | Leishmania mexicana    |
| O96394  | Arginase              | Leishmania amazonensis |

Unconserved 012345678910 Conserved

|                |                 |               |            |             |             |
|----------------|-----------------|---------------|------------|-------------|-------------|
|                | ..... 10 .....  | 20 .....      | 30 .....   | 40 .....    | 50          |
| PTR1_L_amazone | MTAPTVPVAL      | VTGAAKRLGS    | SIAEGLHAEG | YAVCLHYHRS  | AAEANTLSAT  |
| PTR1_L_major   | MTAPTVPVAL      | VTGAAKRLGR    | SIAEGLHAEG | YAVCLHYHRS  | AAEANALSAT  |
| Consistency    | *****           | *****3        | *****      | *****       | *****4***** |
|                | ..... 60 .....  | 70 .....      | 80 .....   | 90 .....    | 100         |
| PTR1_L_amazone | LNARRPNSAI      | TVQADLSNVA    | KAPVSGADGS | APVTLFTRCA  | ALVAACYTHW  |
| PTR1_L_major   | LNARRPNSAI      | TVQADLSNVA    | TAPVSGADGS | APVTLFTRCA  | ELVAACYTHW  |
| Consistency    | *****           | *****3        | *****      | *****3      | *****       |
|                | ..... 110 ..... | 120 .....     | 130 .....  | 140 .....   | 150         |
| PTR1_L_amazone | GRCDVLVNNA      | SSFYPTPLL     | SD         | EDGHEPCV    | GDREAMEAAA  |
| PTR1_L_major   | GRCDVLVNNA      | SSFYPTPLL     | ND         | EDGHEPCV    | GDREAMEATAT |
| Consistency    | *****           | *****5        | *****      | *****44     | *****       |
|                | ..... 160 ..... | 170 .....     | 180 .....  | 190 .....   | 200         |
| PTR1_L_amazone | PYFLIKAF        | AH R-SRHPSRAA | RTNYSIVNMV | DAMTNRPLL   | G YTIYTM    |
| PTR1_L_major   | PYFLIKAF        | AH RFAGTPAKHR | GTNYSIINMV | DAMTNQPLL   | G YTIYTM    |
| Consistency    | *****           | *0621*6623    | 2*****8*** | *****5***** | *****       |
|                | ..... 210 ..... | 220 .....     | 230 .....  | 240 .....   | 250         |
| PTR1_L_amazone | LEGLTRSAAL      | ELAPLQVRVN    | GIGPGLSVLA | DDMPPAVRED  | YRSKVPLYQR  |
| PTR1_L_major   | LEGLTRSAAL      | ELAPLQIRVN    | GVGPGLSVLV | DDMPPAVWEG  | HRSKVPLYQR  |
| Consistency    | *****           | *****8***     | *8*****5   | *****0*3    | 5*****      |
|                | ..... 260 ..... | 270 .....     | 280 .....  |             |             |
| PTR1_L_amazone | DSSAAEVSDV      | VIFLCSSKAK    | YITGTCVKVD | GGYSLTRA    |             |
| PTR1_L_major   | DSSAAEVSDV      | VIFLCSSKAK    | YITGTCVKVD | GGYSLTRA    |             |
| Consistency    | *****           | *****         | *****      | *****       |             |

Figure S1. Alignment between PTR1 of *L.amazonensis* and *L. major*.

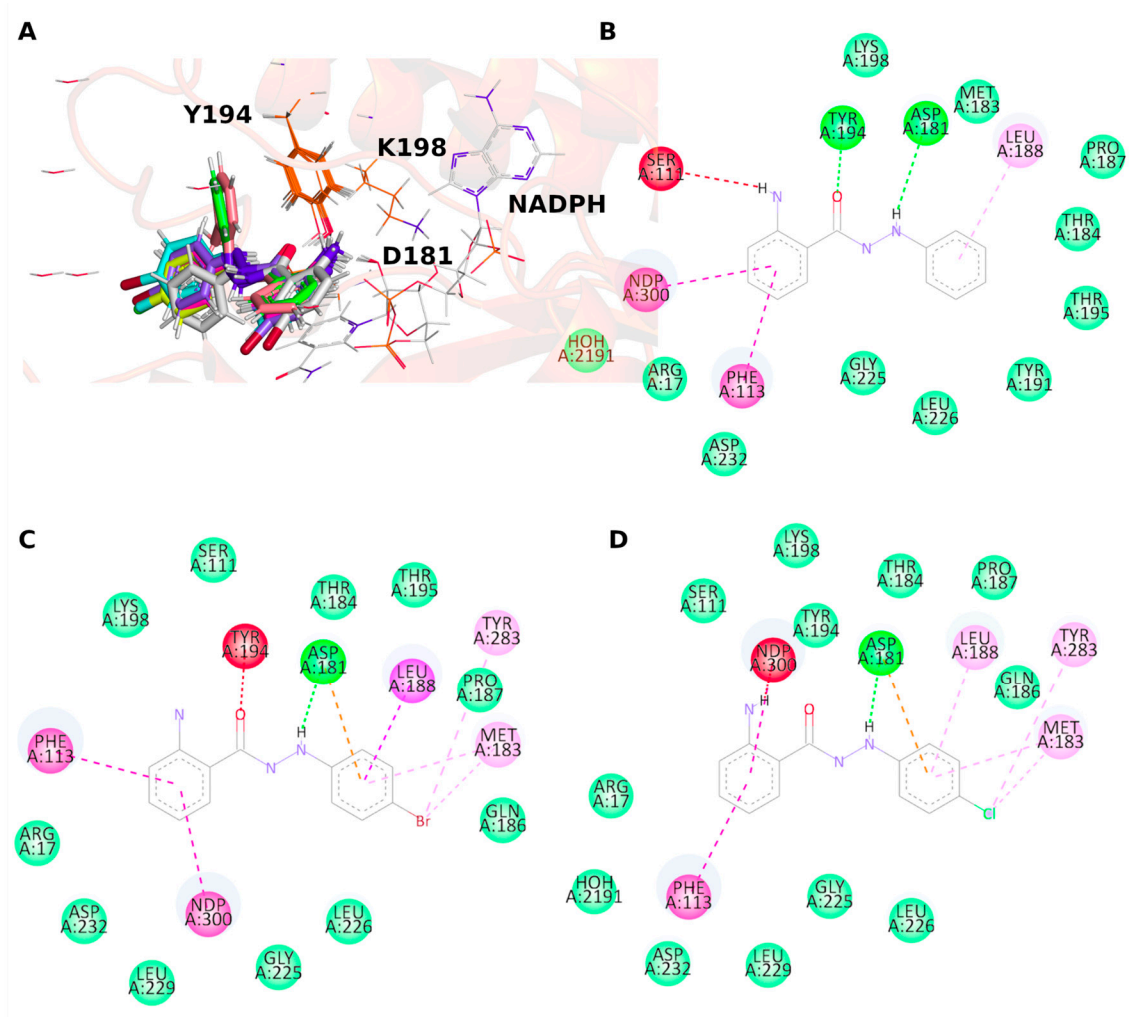

Figure S2. (A) Overlay of Putative binding pose. Docking analysis of inhibitors (B) 1a (C) 1d and (D) 1e. Interactions are colored by type: hydrogen bond, van der Waals, alkyl, Pi-stacked, halogen, unfavorable donor-donor, and Pi-anion/cation are shown by colors green, light green, light pink, pink, cyan, red, and gold, respectively.

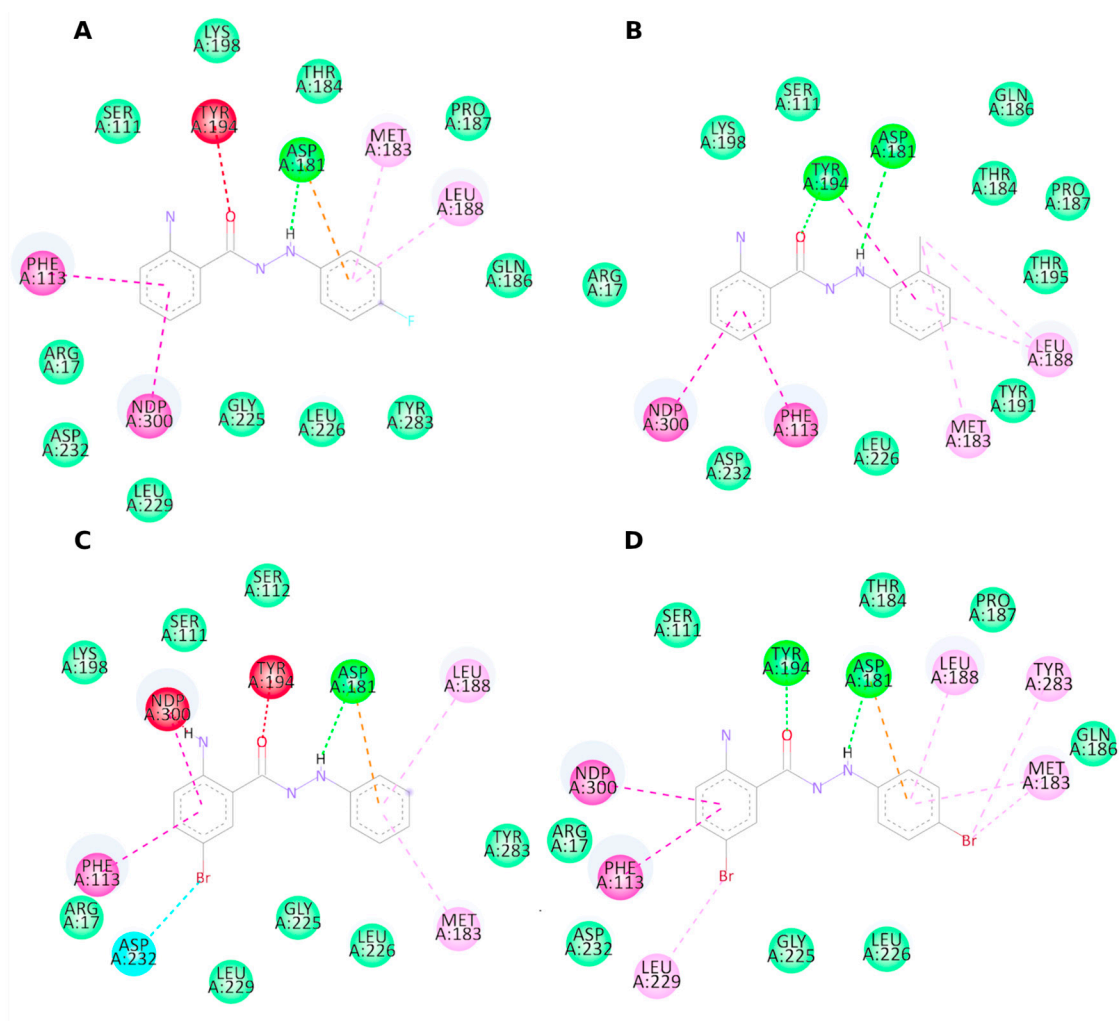

Figure S3.(A) Docking analysis of inhibitors 1f (B) 1j (C) 1c and (D) 1g. Interactions are colored by type: hydrogen bond, van der Waals, alkyl, Pi-stacked, halogen, unfavorable donor-donor, and Pi-anion/cation are shown by colors green, light green, light pink, pink, cyan, red, and gold, respectively.

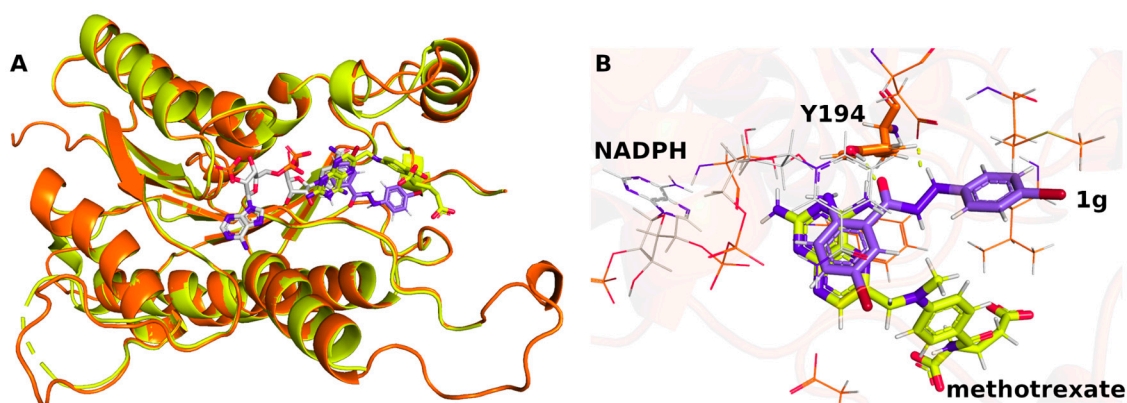

Figure S4. (A) Structural alignment between PTR1 from *L. major* (yellow) and *L. amazonensis* (orange). (B) Comparison between docking pose of inhibitor 1g and methotrexate co-crystallized in PTR1

PROCHECK

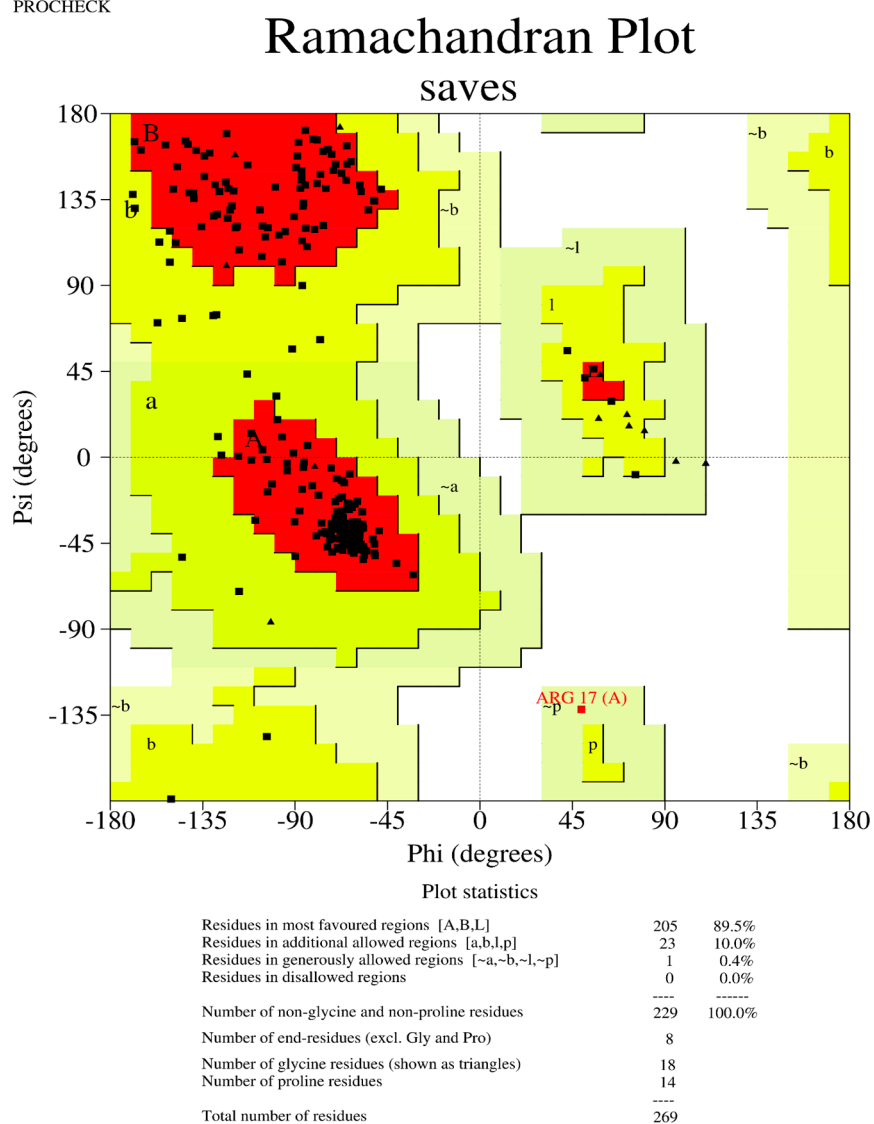

Figure S5. Ramachandran plot of PTR1 model from *L. amazonensis* obtained in AlphaFold.

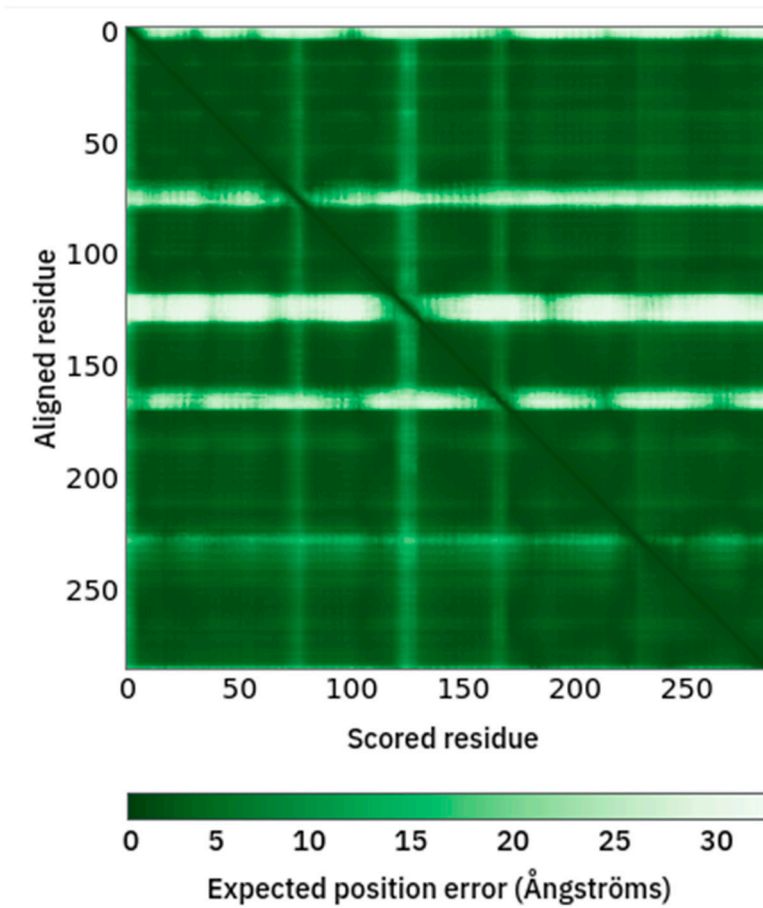

Figure S6. Predicted error of PTR1 model from *L. amazonensis* obtained in AlphaFold.

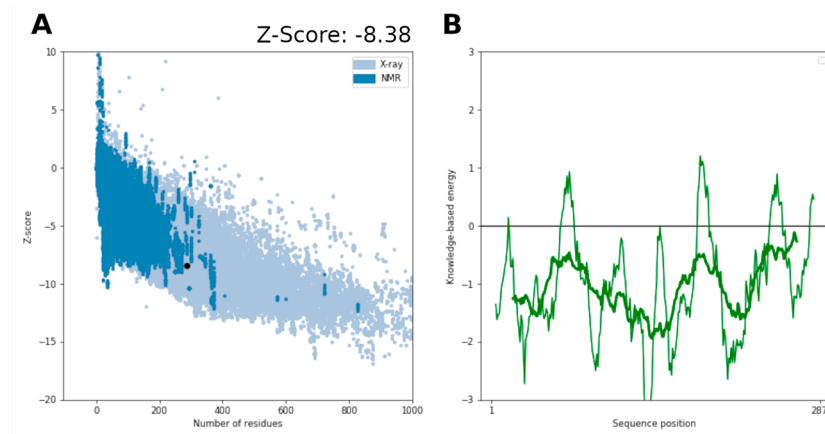

Figure S7. (A) Comparison of z-score of our model against all protein chains in PDB determined by X-ray crystallography (light blue) or NMR spectroscopy (dark blue). (B) Local model quality observed by residue energies averaged in two windows size 10 (light green) and 40 (green).
